# Supplementary material
Source: publisher site journal article supplement (https://www.dovepress.com/article/530763)

**Supplementary material**

# Supplementary Table Legends

**Supplementary Table 1**. SNPs used as IVs

**Supplementary Table 2**. Power calculations in Mendelian randomization study of UP, UTIs, UF, UR and UI

**Supplementary Table 1.** **SNPs used as IVs**

| effect_allele | other_allele | SNP | se.exposure | beta.exposure | eaf.exposure | pval.exposure | **R2** | **F** |
| --- | --- | --- | --- | --- | --- | --- | --- | --- |
| G | A | rs17756076 | 0.0283 | 0.18 | 0.0630765 | 2.16E-10 | 0.003829541 | 902.709785 |
| A | G | rs181661155 | 0.0245 | 0.1568 | 0.120847 | 1.60E-10 | 0.005224232 | 1233.196645 |
| C | T | rs6826768 | 0.0186 | 0.156 | 0.216062 | 4.47E-17 | 0.008244025 | 1951.953911 |
| T | C | rs7925747 | 0.0177 | -0.0979 | 0.785549 | 3.40E-08 | 0.003229213 | 760.7404648 |

**Supplementary Table 2. Power calculations in Mendelian randomization study of UP, UTIs, UF, UR and UI**

| **Supplementary Table 2. Power calculations in Mendelian randomization study of UP, UTIs, UF, UR and UI** | | | | | | |  |
| --- | --- | --- | --- | --- | --- | --- | --- |
| **Exposure** | **Outcome** | **R2 (%)** | **Sample size** | **Proportion of cases** | **Causal effect (OR)** | **Statistic power (%)** |  |
| **UP** | **UTIs** | 2.05% | 397,867 | 1.000 | 1.103 | 99.3% |  |
| **UP** | **UF** | 2.05% | 206,250 | 0.016 | 1.162 | 23.3% |  |
| **UP** | **UR** | 2.05% | 207,909 | 0.024 | 1.026 | 4.4% |  |
| **UP** | **UI** | 2.05% | 204,267 | 0.007 | 1.357 | 36.1% |  |
| Abbreviations: UP, uterine prolapse; UTIs, urinary tract infections; UF, urinary frequency; UR, urinary retention; UI, urinary incontinence; R2, variance explained by the genetic variants; OR, odds ratio. | | | | | | |  |
|  |

# Supplementary Figure Legends

**Supplementary Figure 1**. Scatter plots illustrating the effects of SNPs on UP, UTIs, UF, UI and UR. (A) UP and UTIs; (B) UP and UF; (C) UP and UI; (D) UP and UR.

**Supplementary Figure 2**. Funnel plots of the association of UP with UTIs, UF, UI and UR. (A) UP and UTIs; (B) UP and UF; (C) UP and UI; (D) UP and UR.

**Supplementary Figure 3.** Forest plots of UP SNPs for UTIs, UF, UI and UR. (A) UP and UTIs; (B) UP and UF; (C) UP and UI; (D) UP and UR.

**Supplementary Figure 4** MR leave−one−out sensitivity analysis for UP and UTIs, UF, UI and UR. (A) UP and UTIs; (B) UP and UF; (C) UP and UI; (D) UP and UR.

**Supplementary Figure 1**. Scatter plots illustrating the effects of SNPs on UP, UTIs, UF, UI and UR. (A) UP and UTIs; (B) UP and UF; (C) UP and UI; (D) UP and UR.


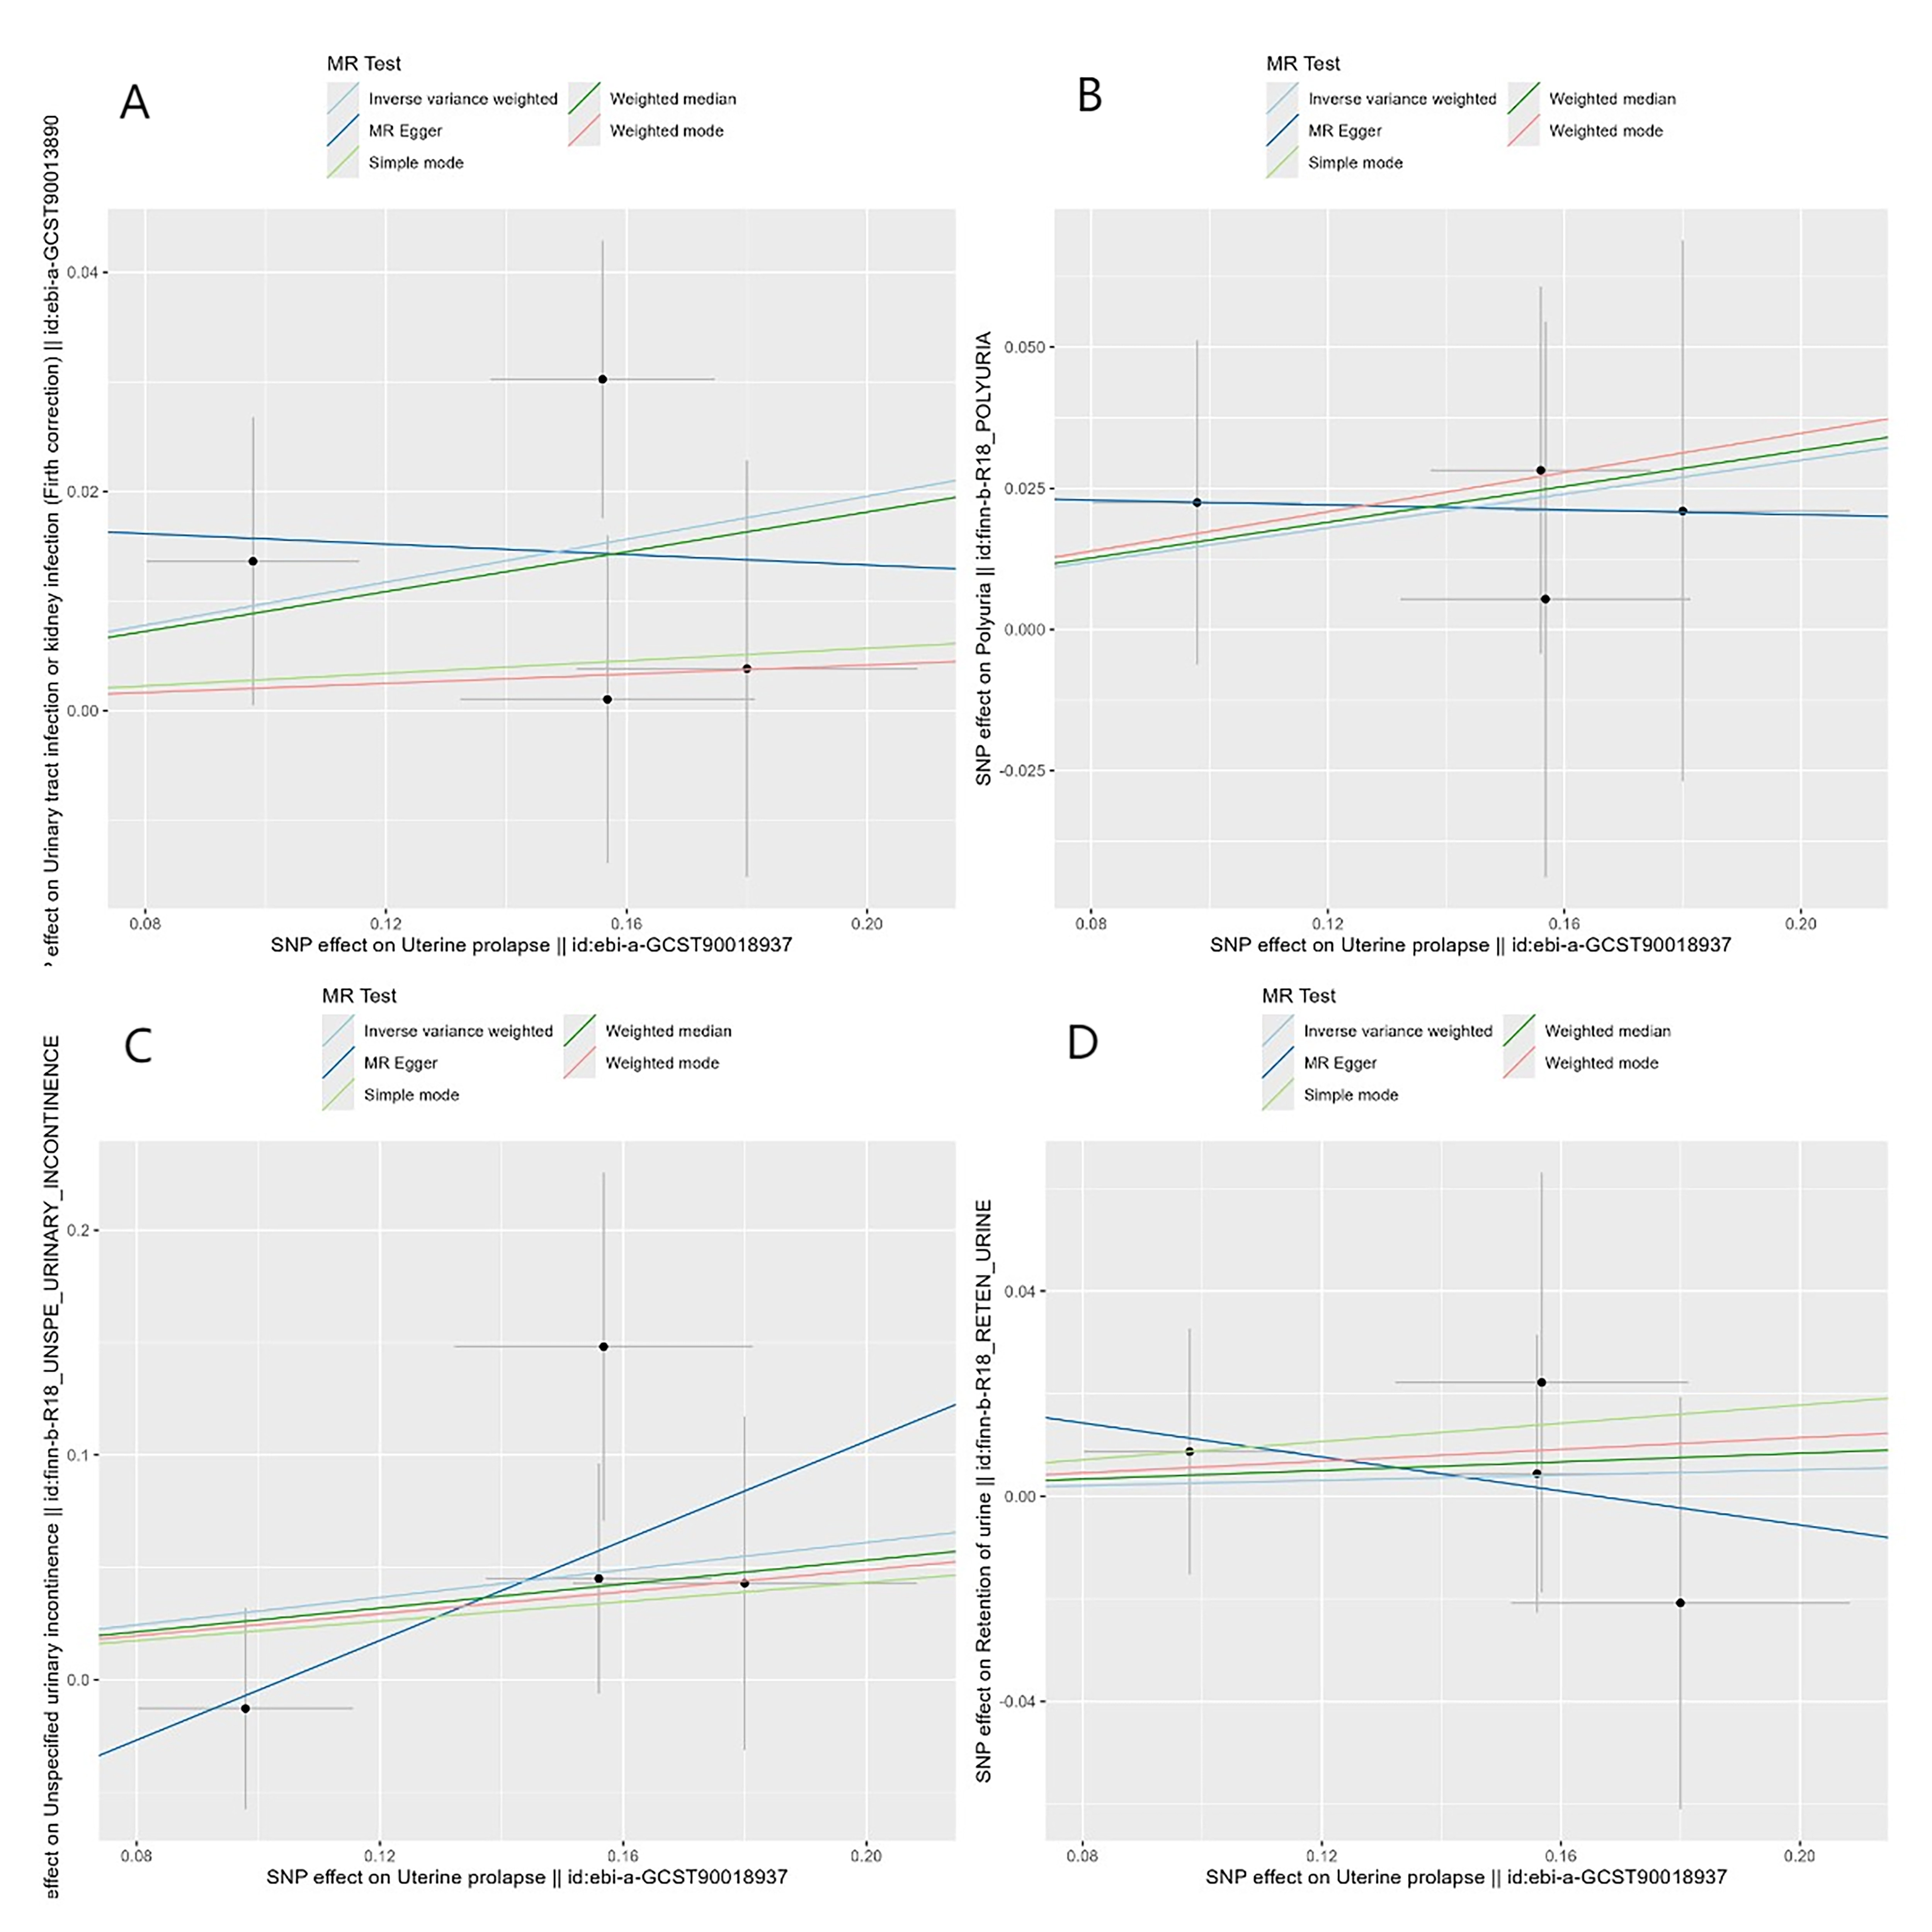


**Supplementary Figure 2**. Funnel plots of the association of UP with UTIs, UF, UI and UR. (A) UP and UTIs; (B) UP and UF; (C) UP and UI; (D) UP and UR.


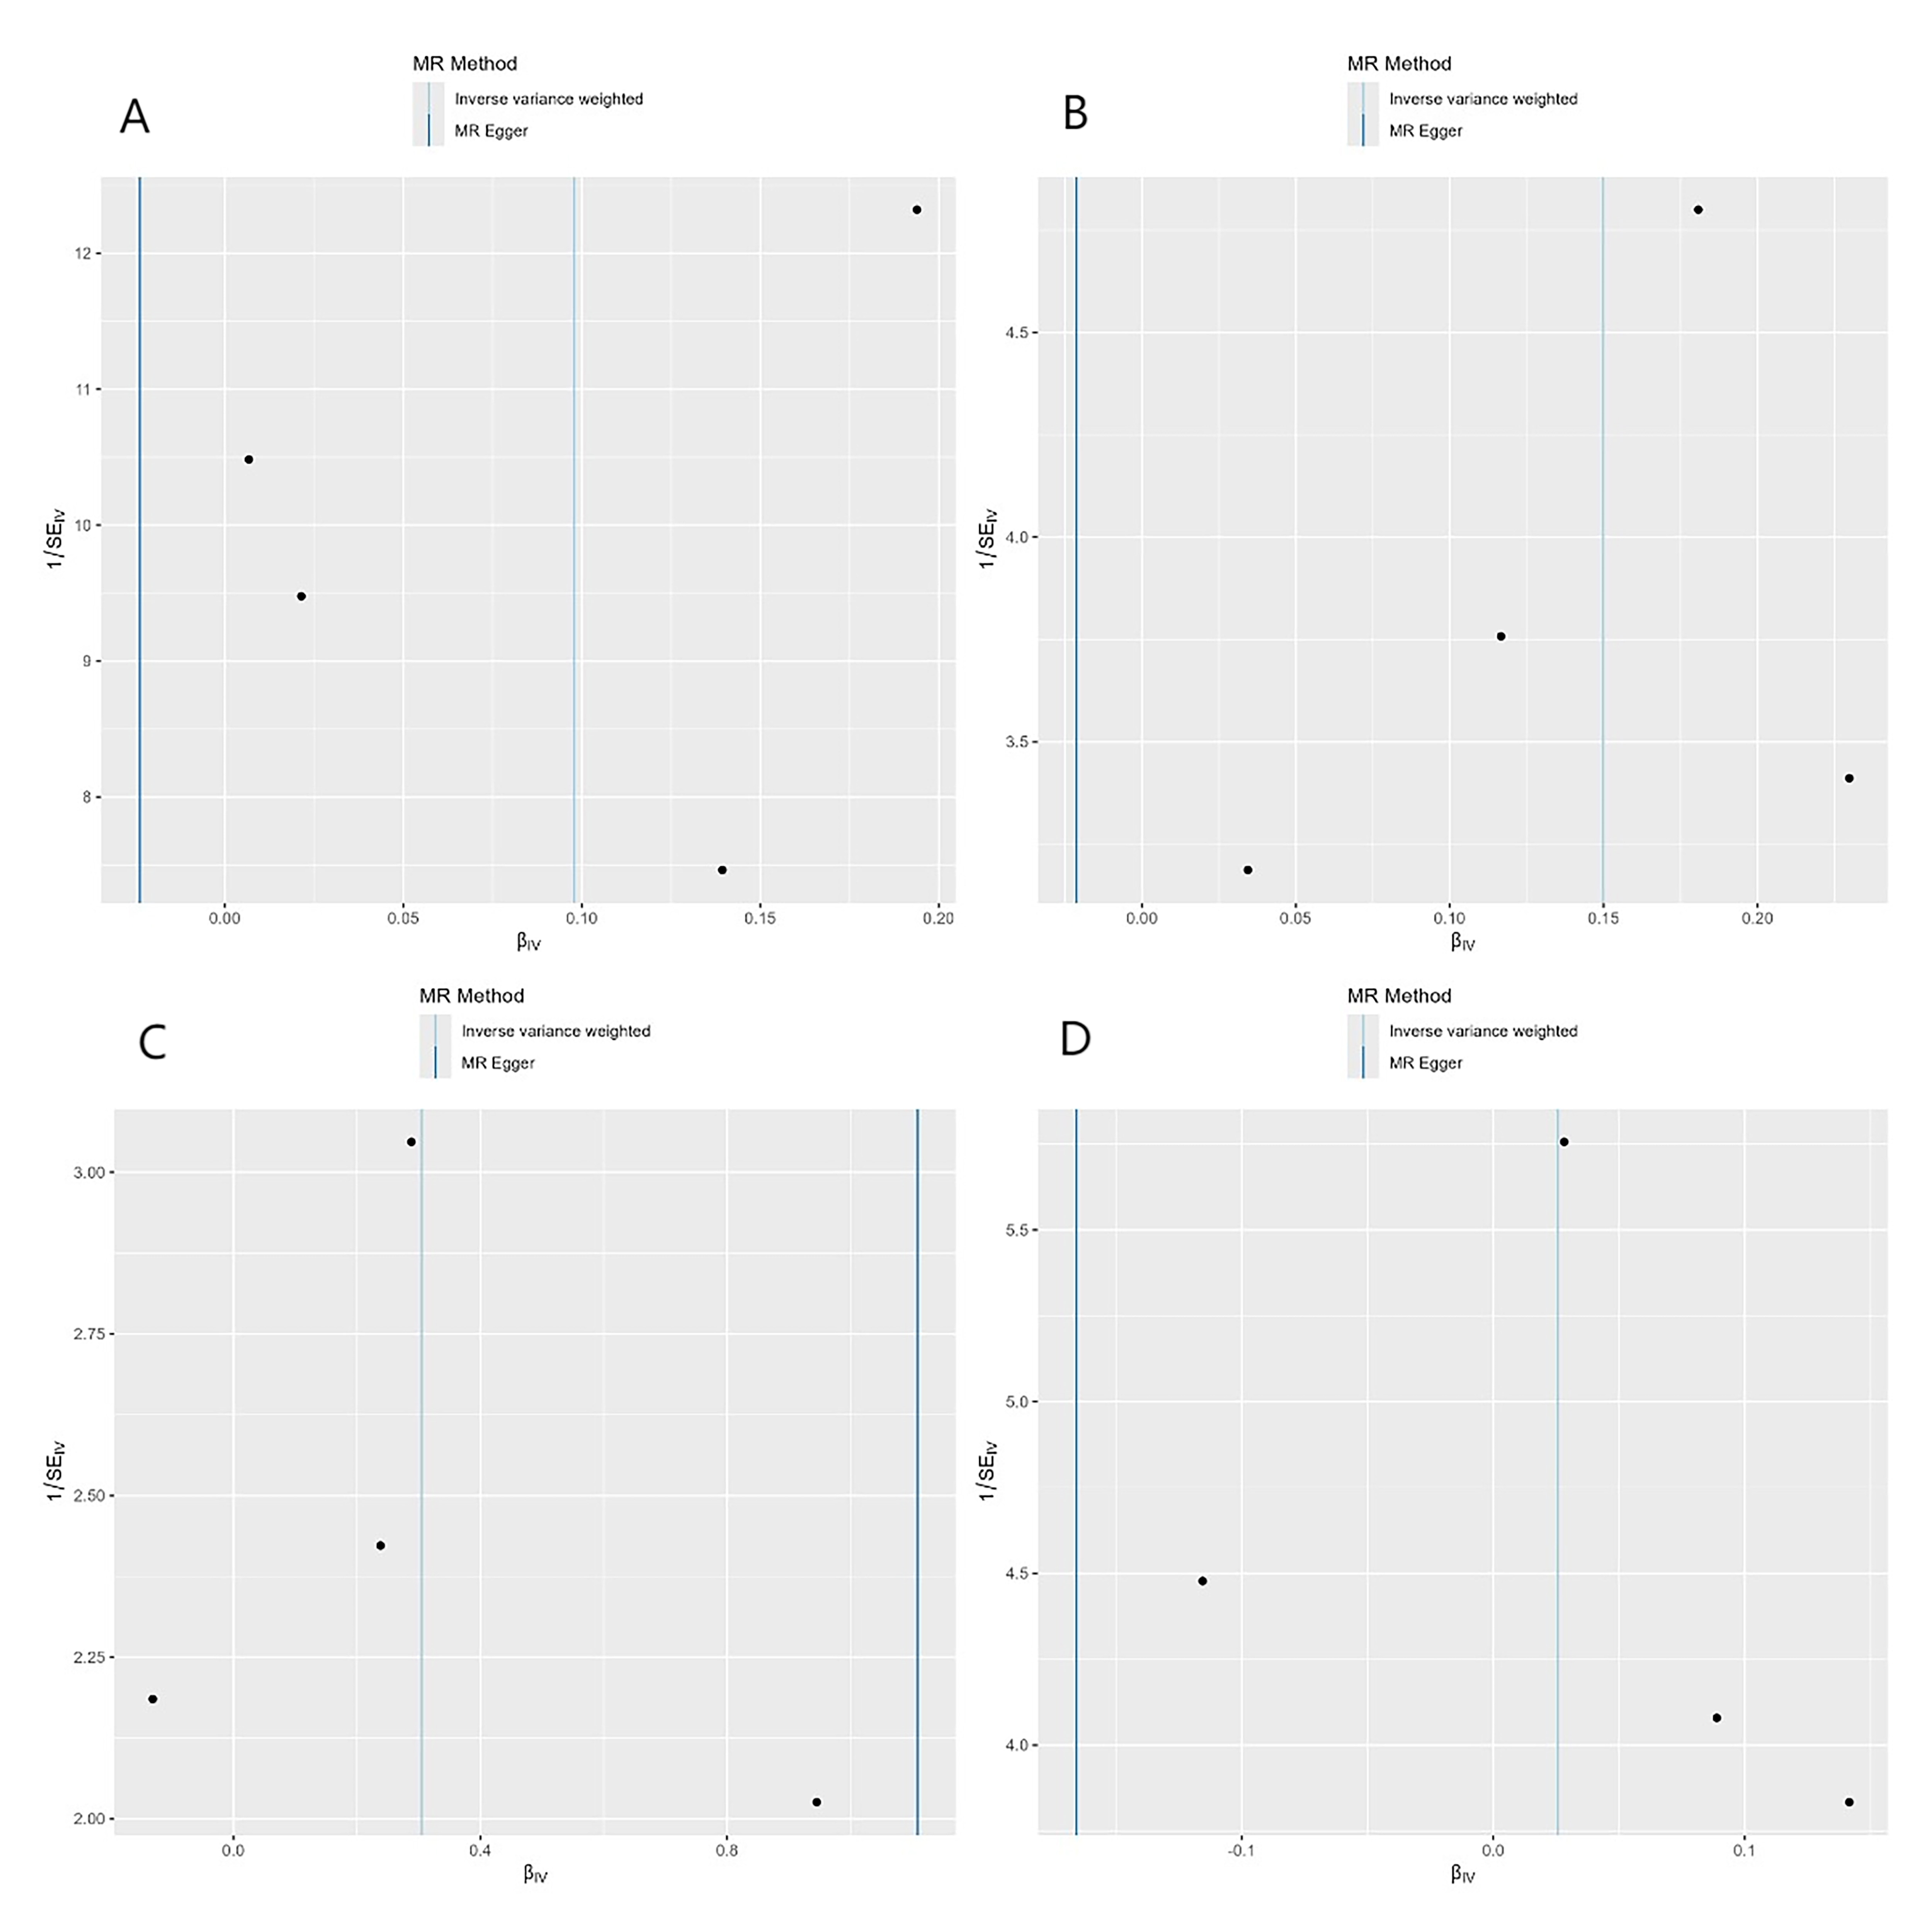


**Supplementary Figure 3**. Forest plots of UP SNPs for UTIs, UF, UI and UR. (A) UP and UTIs; (B) UP and UF; (C) UP and UI; (D) UP and UR.


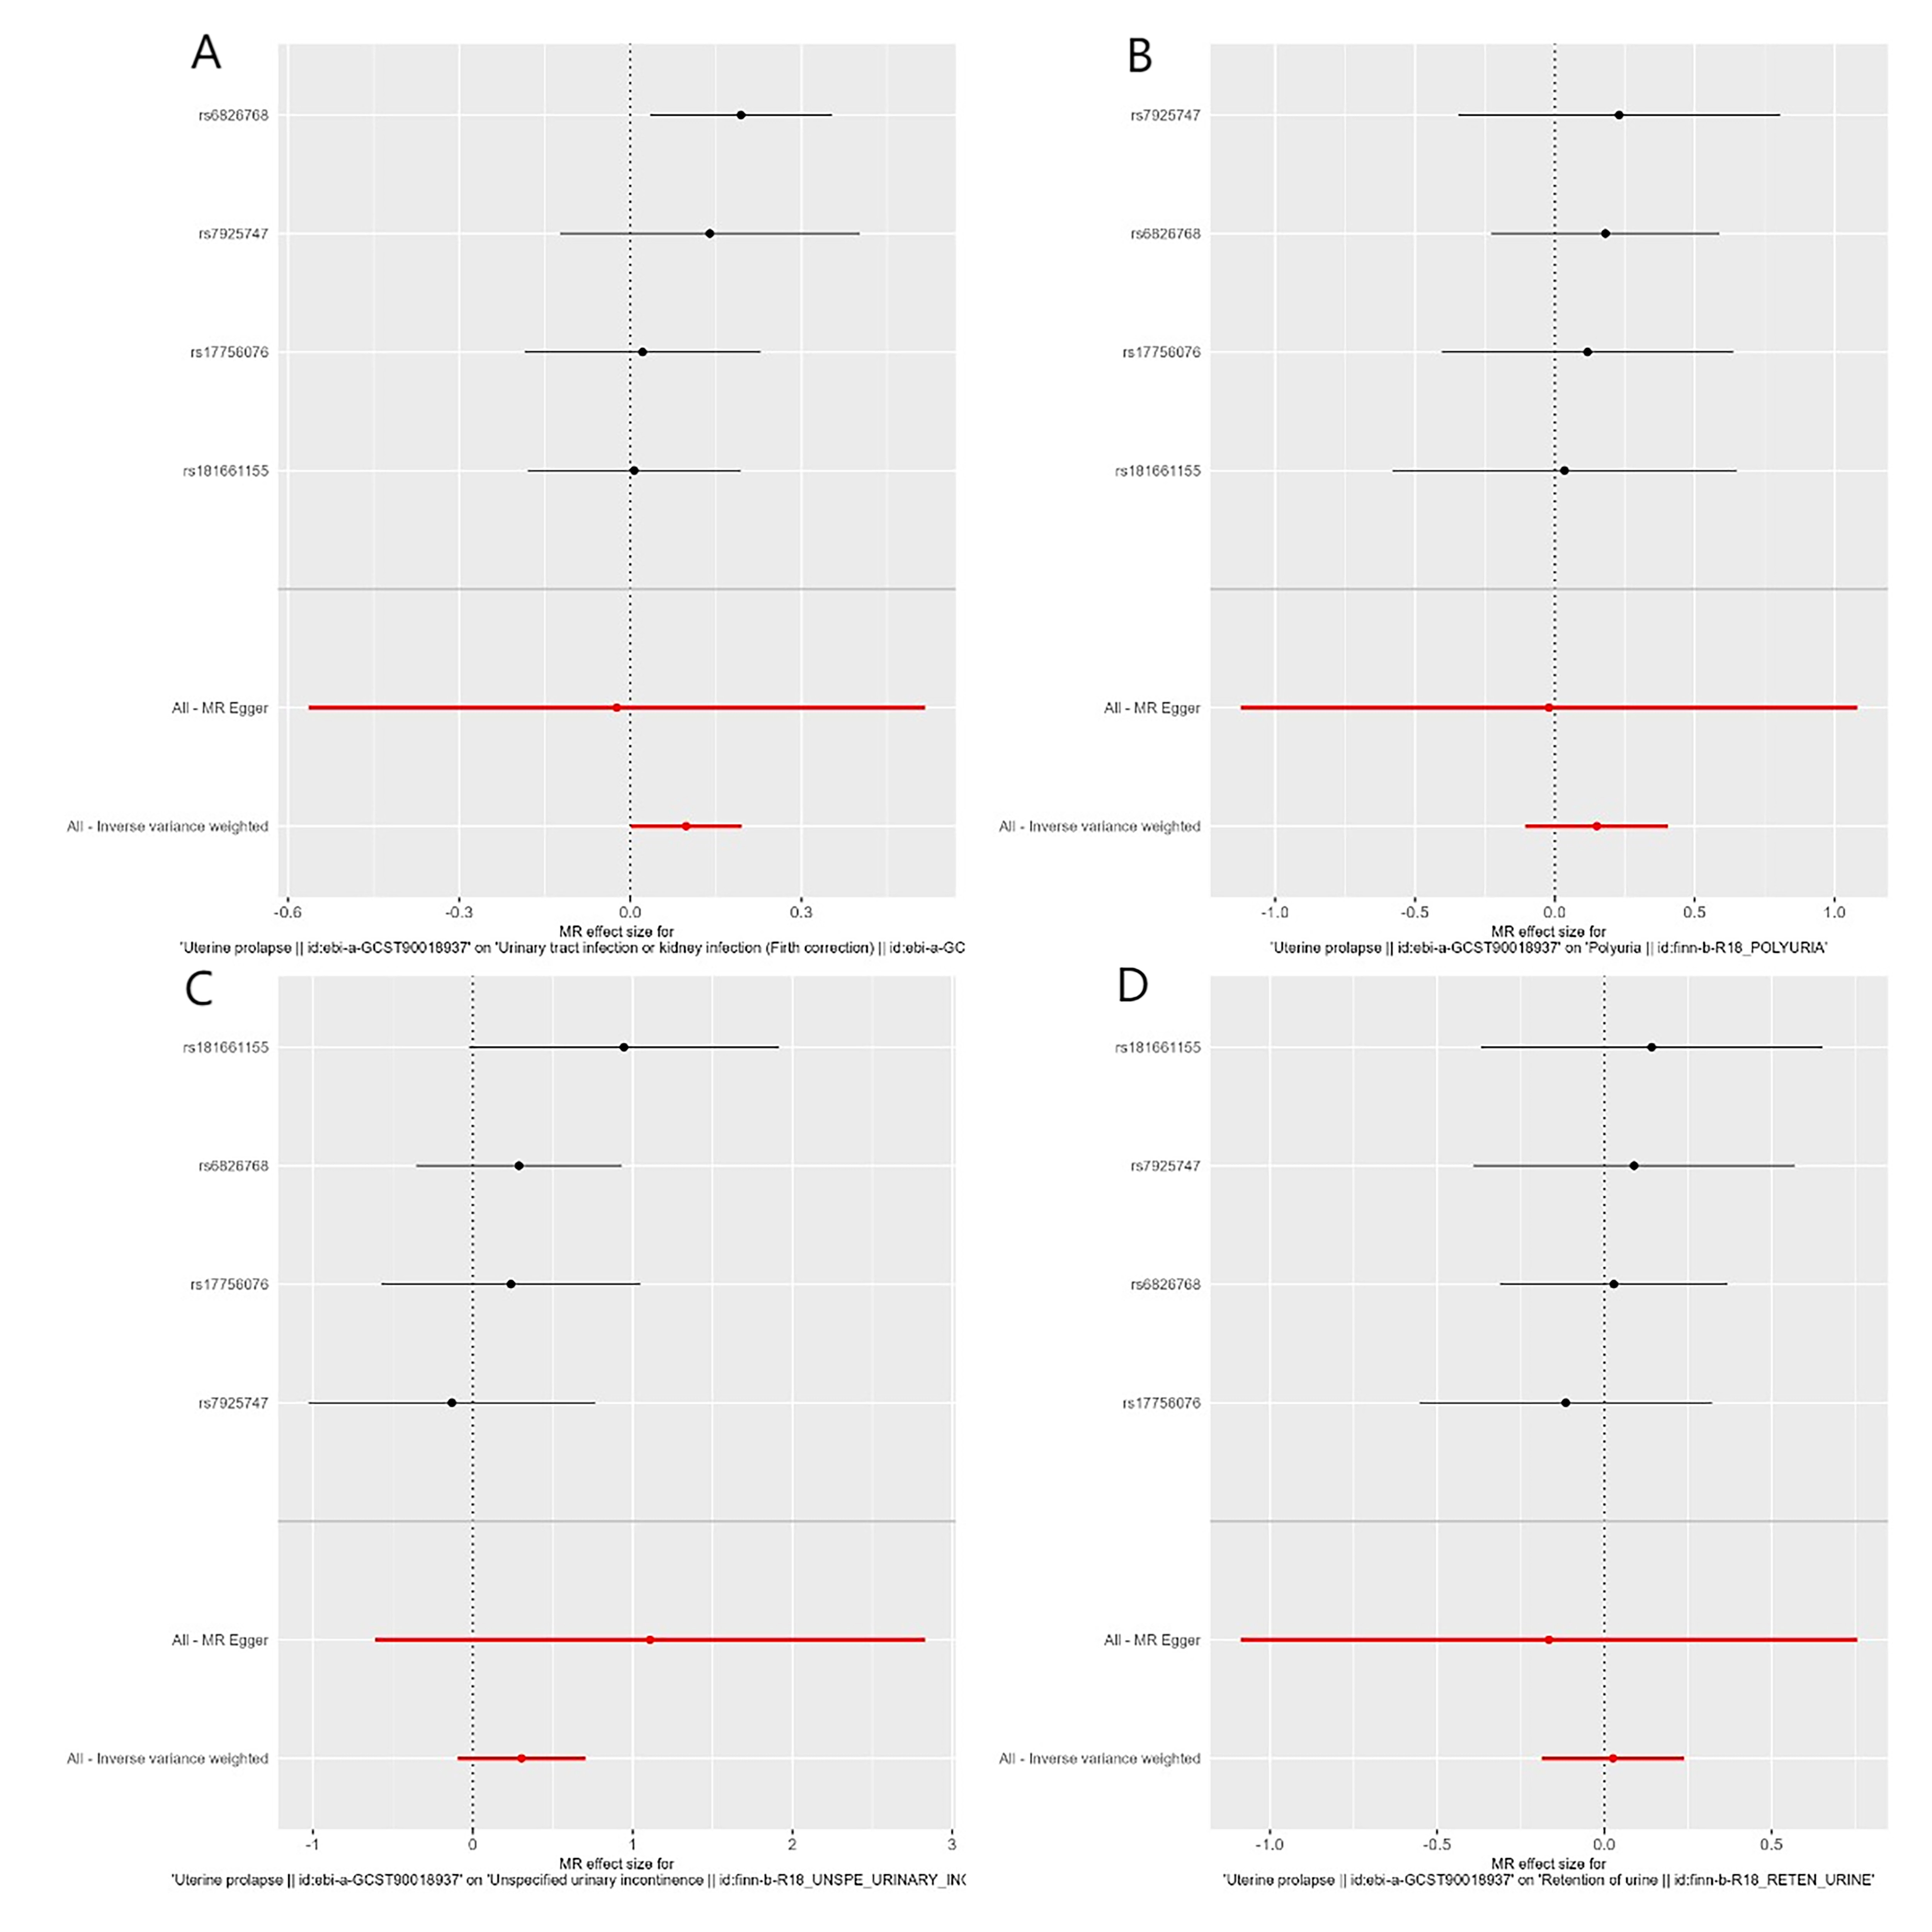


**Supplementary Figure 4**. MR leave−one−out sensitivity analysis for UP and UTIs, UF, UI and UR. (A) UP and UTIs; (B) UP and UF; (C) UP and UI; (D) UP and UR.


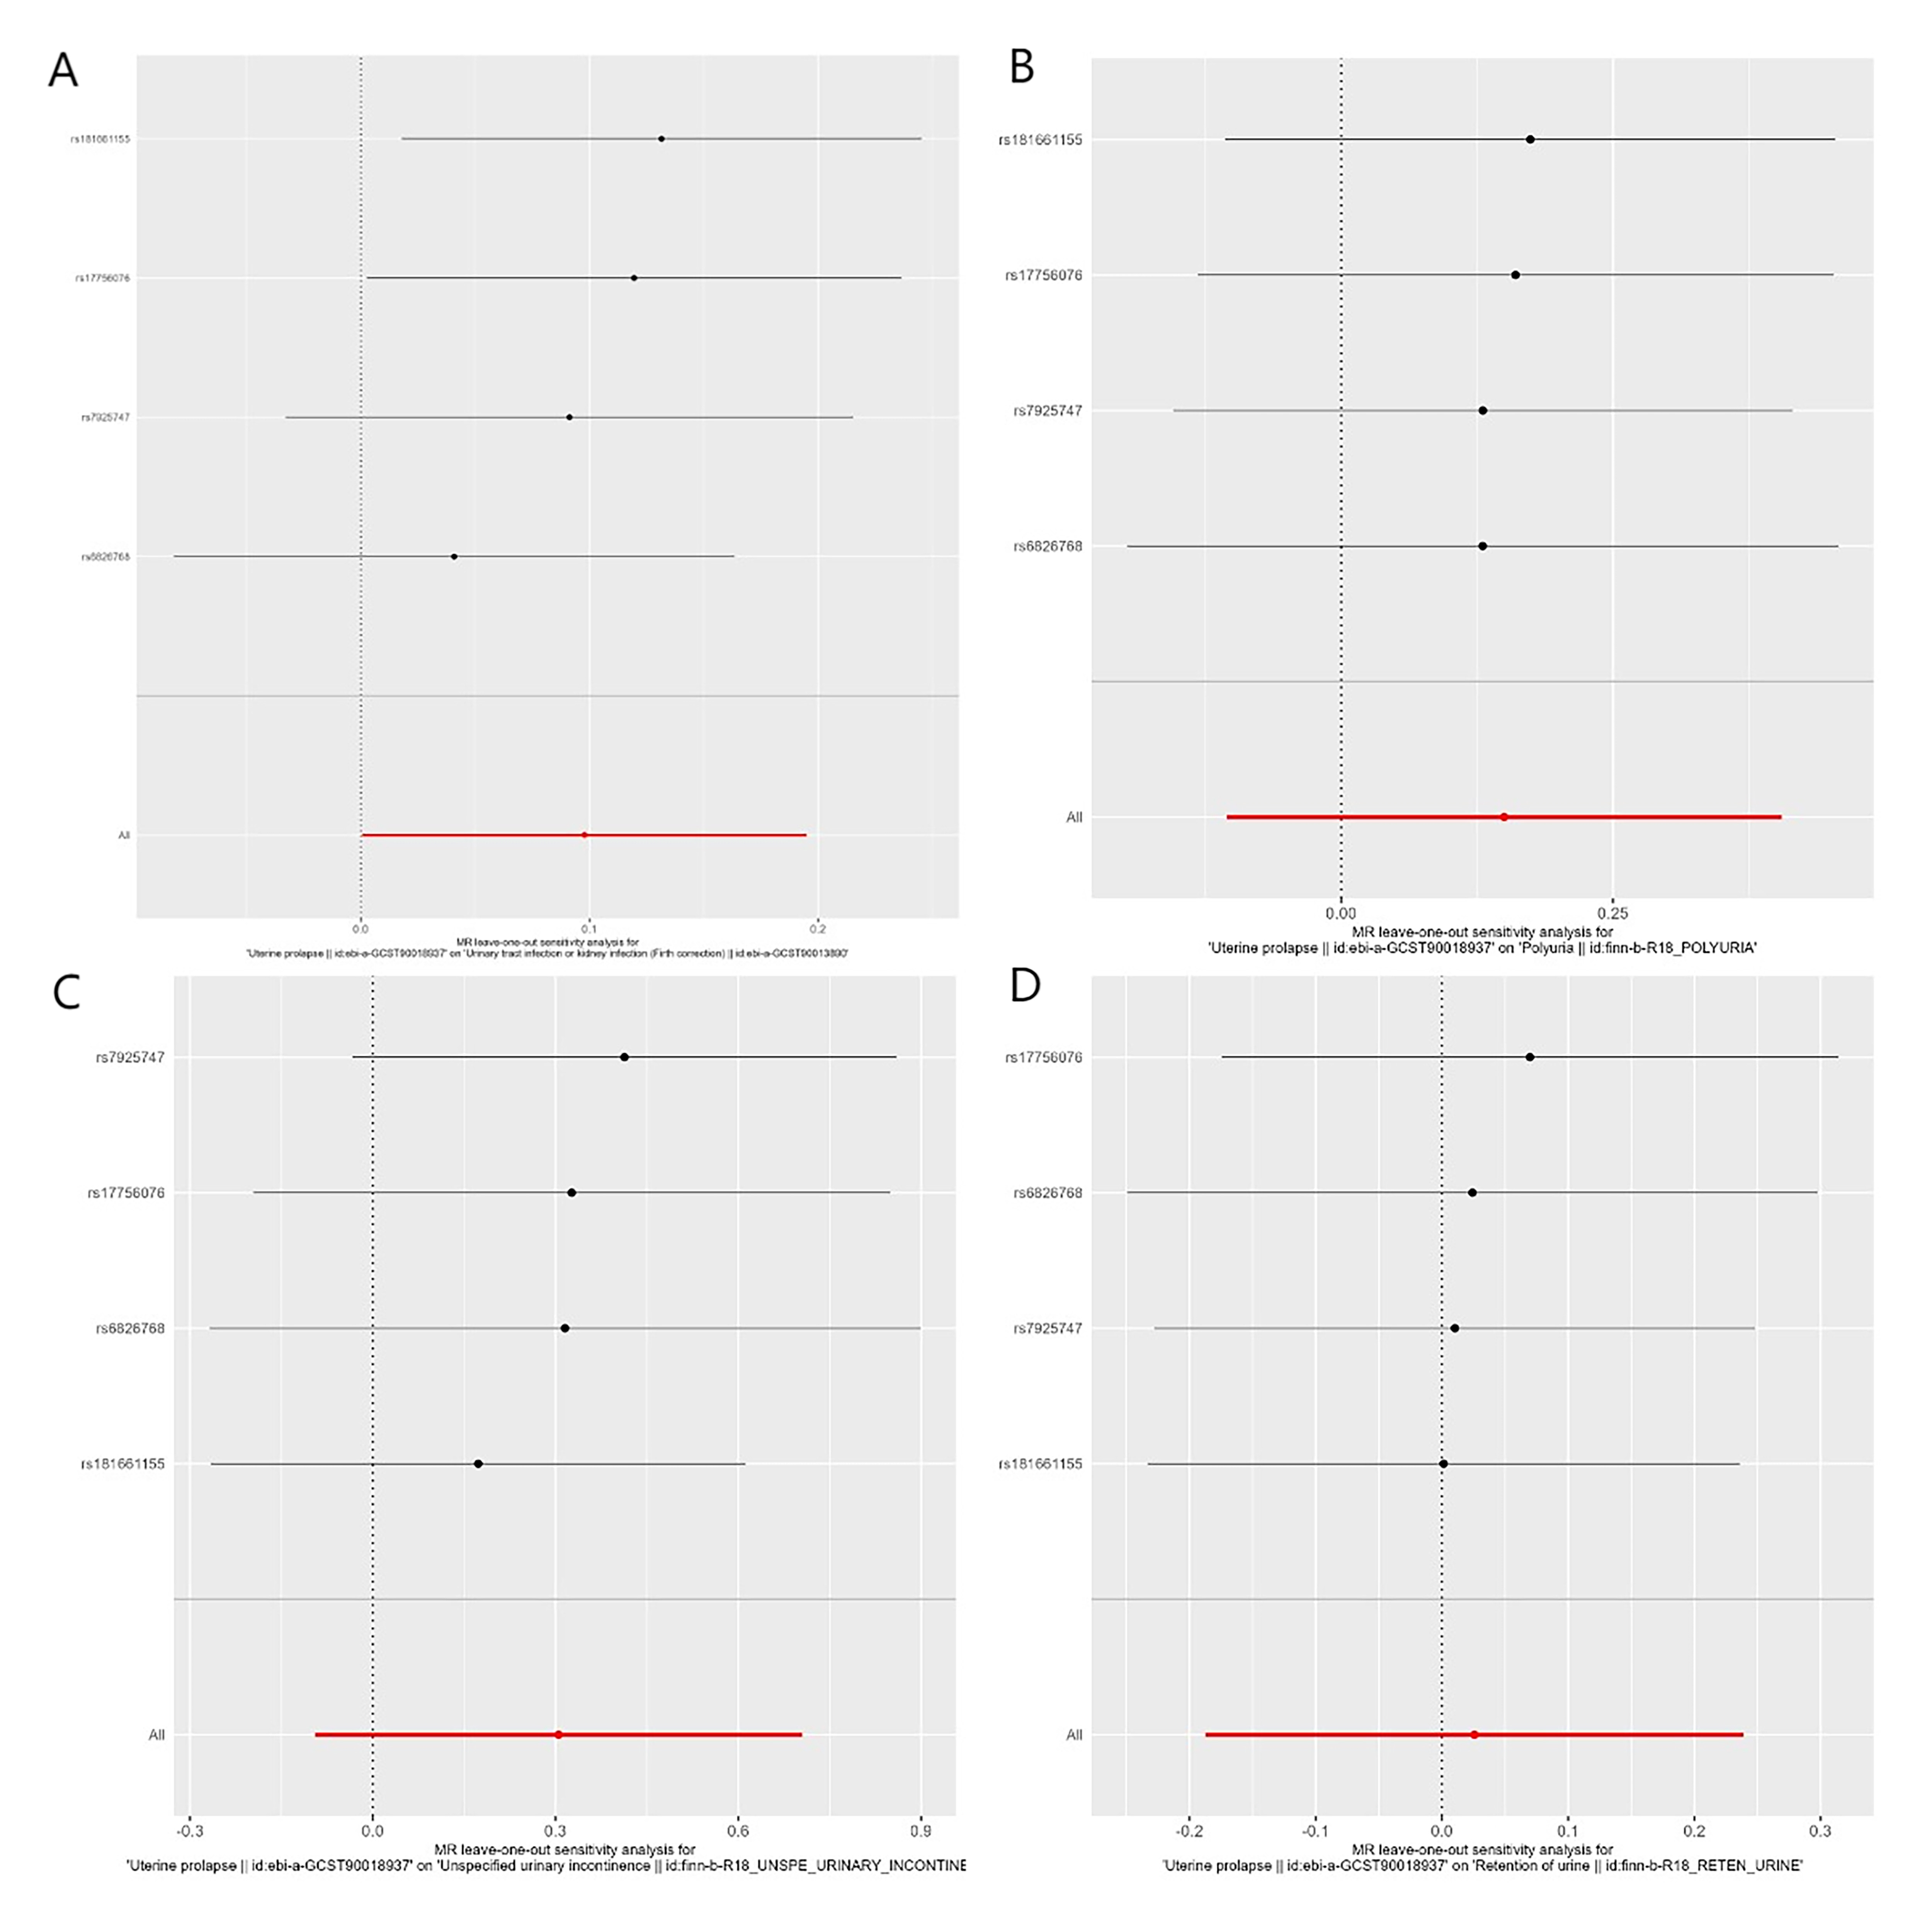

Supplement: Supplementary file 1 [file 530763%20Supplementary%20material.doc]
